# Supplementary material for: Unusual double-bond migration as a plausible key reaction in the biosynthesis of the isoprenoidal membrane lipids of methanogenic archaea
Source: Royal Society of Chemistry journal article supplement (doi:10.1039/b003948i), 2000-01-01
Supplement: b003948i1.pdf [file b003948i1.pdf]

<sup>1</sup>H NMR

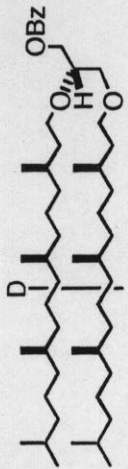

from *Haloarcula japonica*

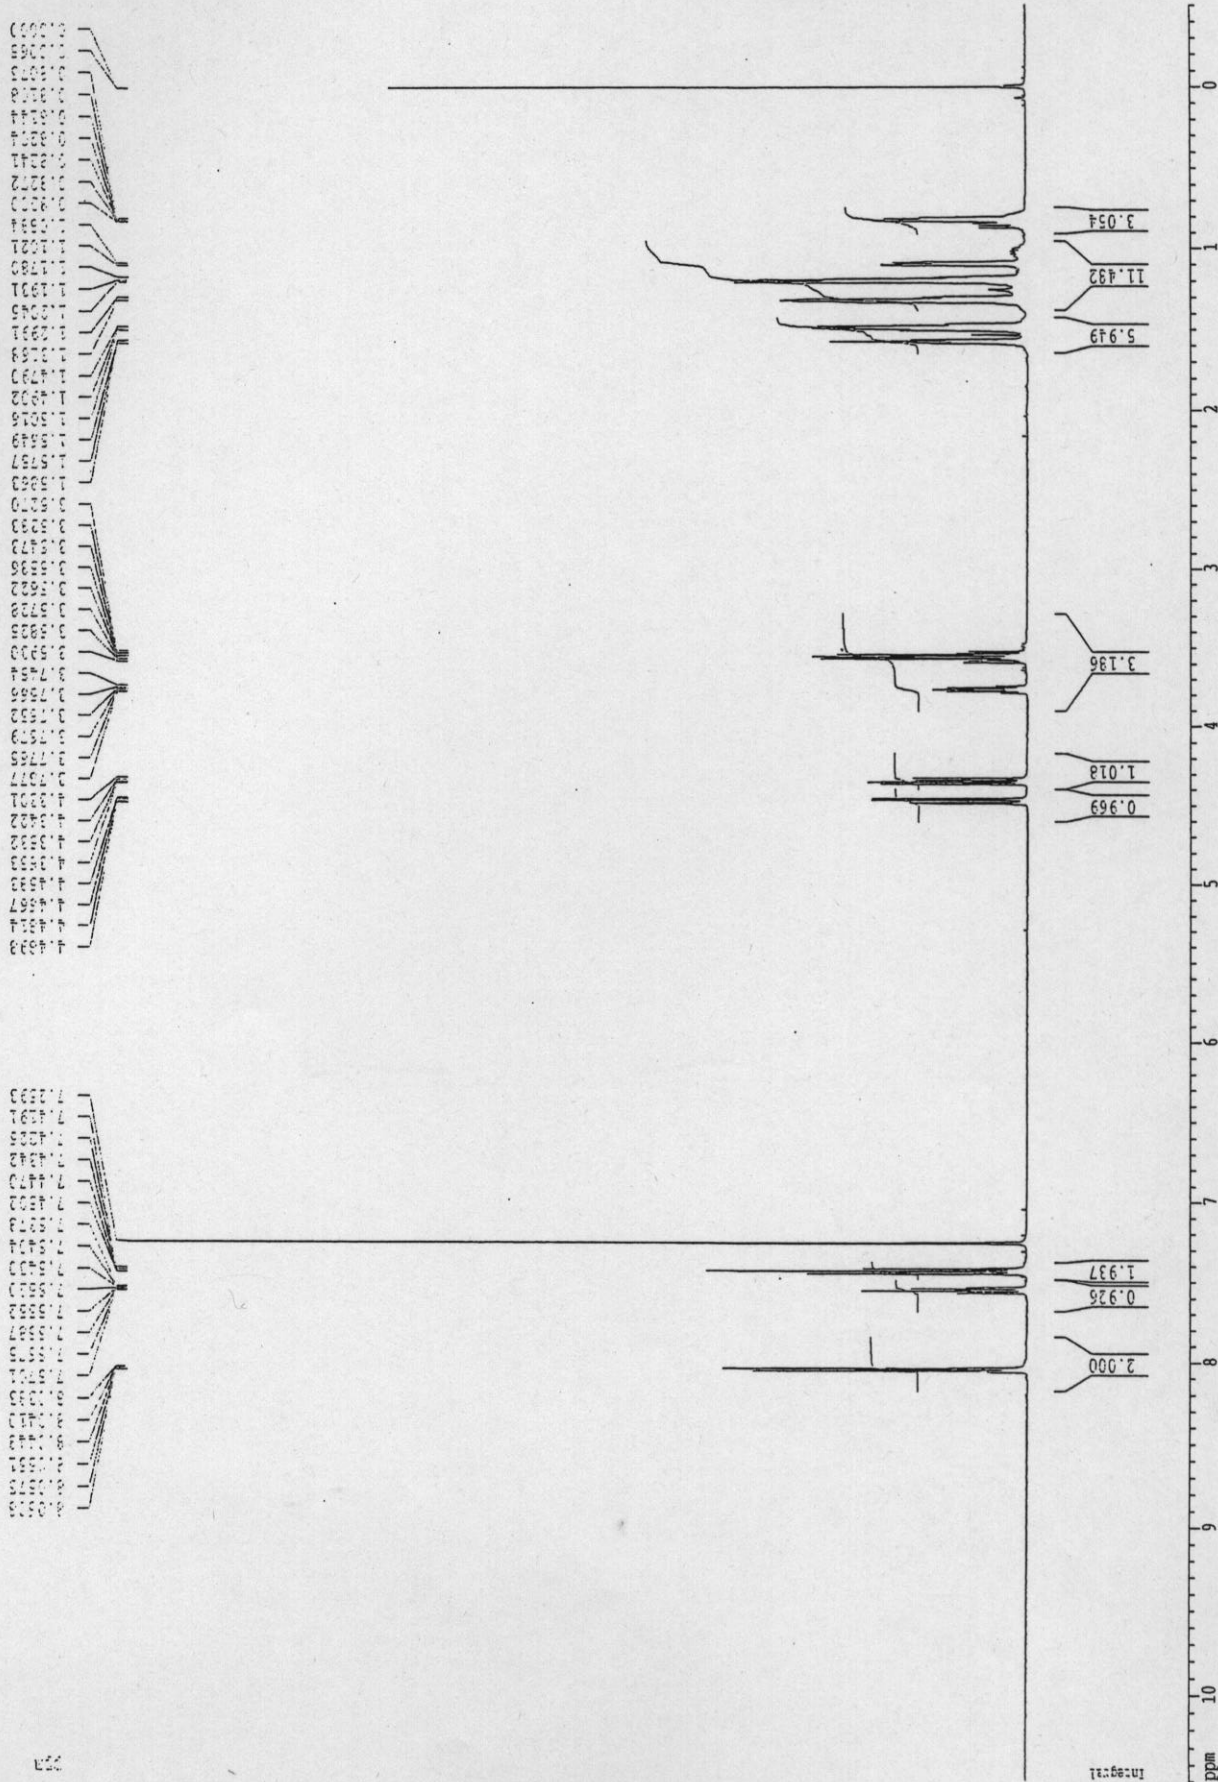

Current Data Parameters  
 NAME ymatsu-takyo  
 EXPNO 20  
 PROCNO 1

F2 - Acquisition Parameters  
 Date\_ 20000417  
 Time 2.31  
 INSTRUM spect  
 PROBHD 5 mm Multinu  
 FULPROG zg  
 TD 32768  
 SOLVENT CDCl3  
 NS 16  
 DS 0  
 SWH 7002.801 Hz  
 FIDRES 0.213709 Hz  
 AQ 2.3396852 sec  
 RG 181  
 DW 71.400 usec  
 DE 6.00 usec  
 TE 300.0 K  
 D1 3.0000000 sec  
 P1 4.50 usec  
 SF01 500.1330008 MHz  
 NUC1 1H  
 PL1 -2.10 dB

F2 - Processing parameters  
 SI 32768  
 SF 500.1300136 MHz  
 WDW EN  
 SSB 0  
 LB 0.20 Hz  
 GB 0  
 PC 1.00

ID NMR plot parameters  
 CX 33.00 cm  
 FIP 10.500 ppm  
 F1 5251.37 Hz  
 F2P -0.500 ppm  
 F2 -250.07 Hz  
 PPMCH 0.33333 ppm/cm  
 HZCH 166.71001 Hz/cm
