# Supplementary material for: Unusual double-bond migration as a plausible key reaction in the biosynthesis of the isoprenoidal membrane lipids of methanogenic archaea
Source: Royal Society of Chemistry journal article supplement (doi:10.1039/b003948i), 2000-01-01
Supplement: b003948i4.pdf [file b003948i4.pdf]

$^{13}\text{C}\{^1\text{H} \& ^2\text{H}\}$  NMR

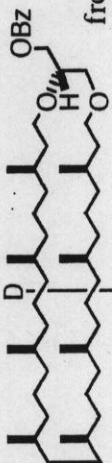

from *Methanococcus jannaschii*

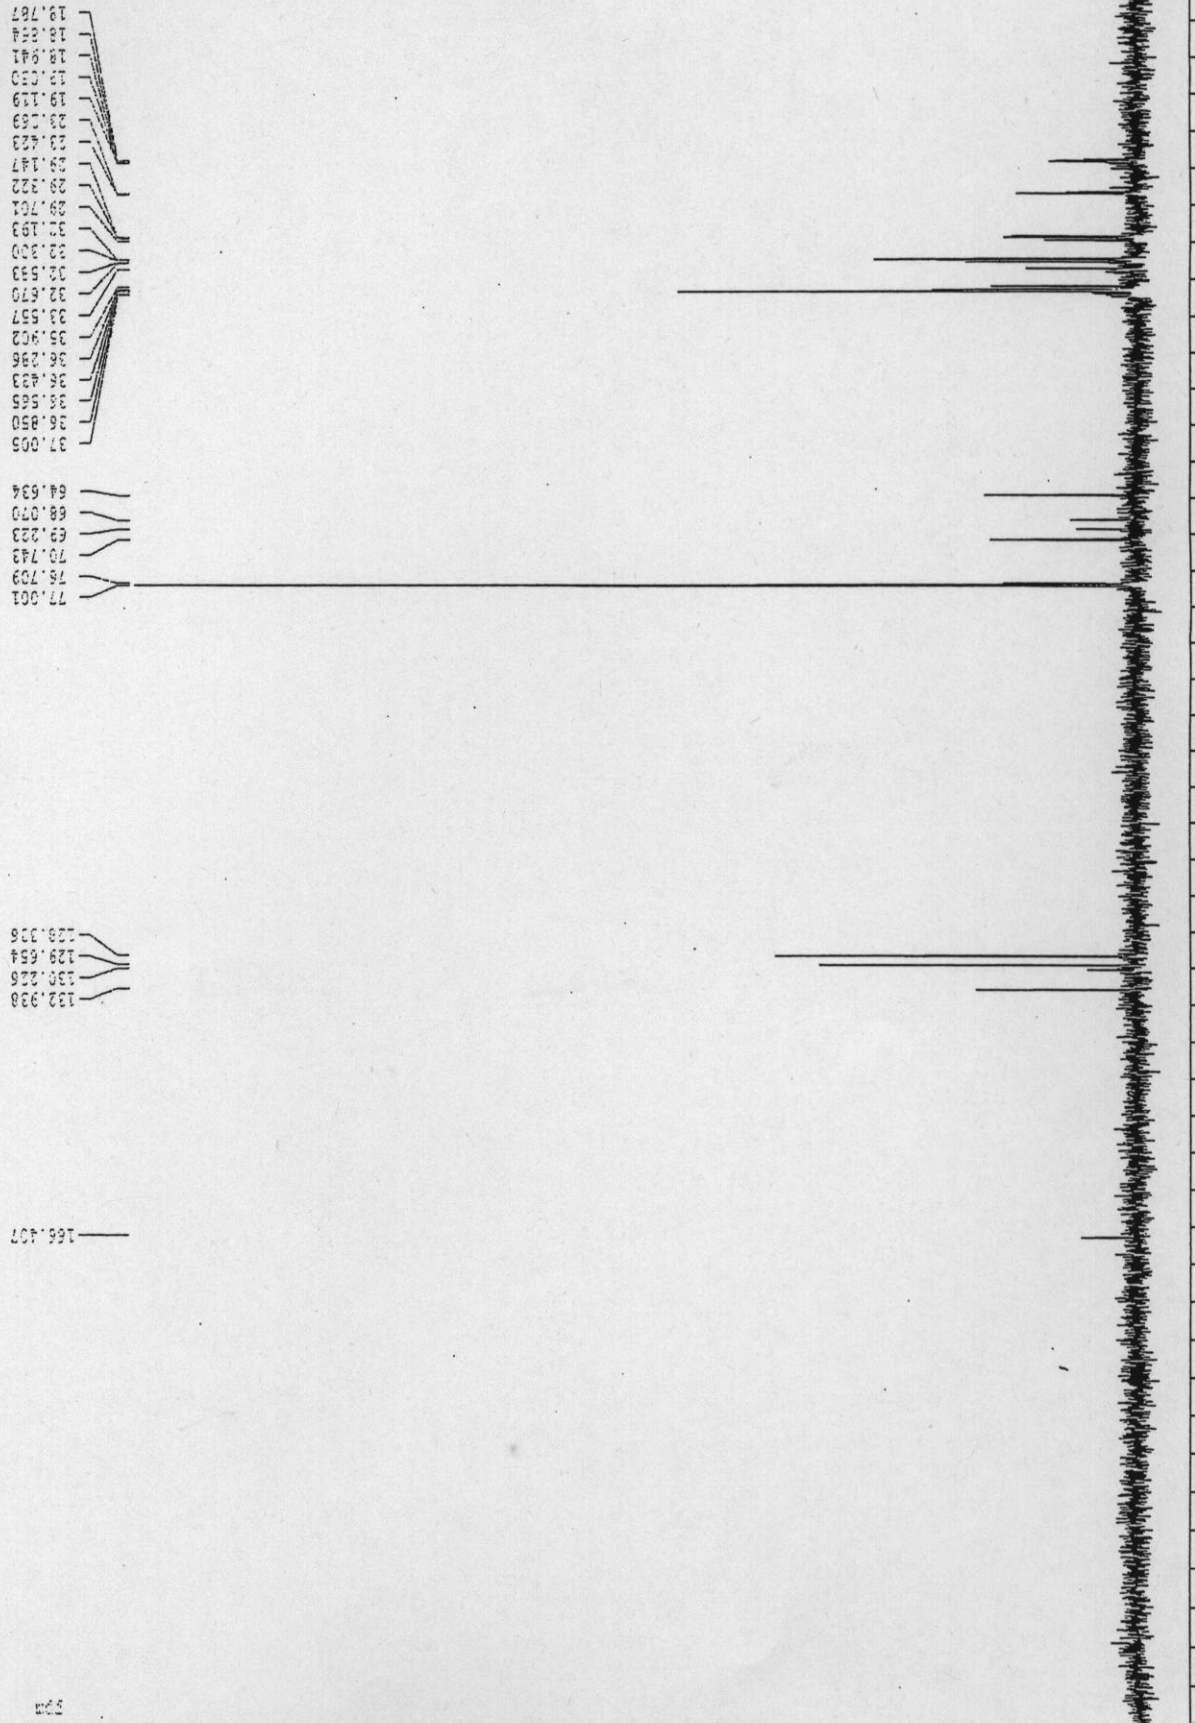

Current Data Parameters  
 NAME ymatsu-takvo  
 EXPNO 15  
 PROCNO 1

F2 - Acquisition Parameters  
 Date\_ 20000224  
 Time 1.37  
 INSTRUM spect  
 PROBHD 5 mm BB(2H)

PULPROG zgpg2h  
 TD 32768  
 SOLVENT CDC13  
 NS 123574  
 DS 0  
 SNH 30303.031 Hz  
 FIDRES 0.924775 Hz  
 AQ 0.5407220 sec  
 RG 5160.6  
 DW 16.500 usec  
 DE 6.00 usec  
 TE 300.0 K  
 d11 0.0300000 sec  
 d12 0.0002000 sec  
 d13 0.0000300 sec  
 PL16 21.00 dB  
 PL13 18.70 dB  
 D1 2.0000000 sec  
 CPDPRG2 waitz16  
 PCPD2 90.00 usec  
 SFO2 500.1320005 MHz  
 NUC2  $^1\text{H}$   
 PL2 120.00 dB  
 PL12 18.70 dB  
 P1 4.30 usec  
 SFO1 125.7715723 MHz  
 NUC1  $^{13}\text{C}$   
 PL1 3.00 dB  
 CPDPRG3 waitz16  
 PCPD3 300.00 usec  
 SFO3 76.7733071 MHz  
 NUC3  $^2\text{H}$   
 PL3 120.00 dB

F2 - Processing parameters  
 SI 32768  
 SF 125.7577885 MHz  
 WDW EM  
 SSB 0  
 LB 2.00 Hz  
 GB 0  
 PC 1.40

ID NMR plot parameters  
 CX 33.00 cm  
 F1P 230.000 ppm  
 F1 20924.29 Hz  
 F2P -10.000 ppm  
 F2 -1257.58 Hz  
 PPMCM 7.27273 ppm/cm

<sup>13</sup>C NMR

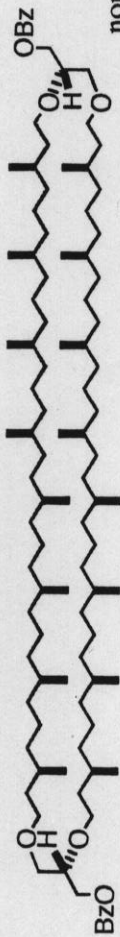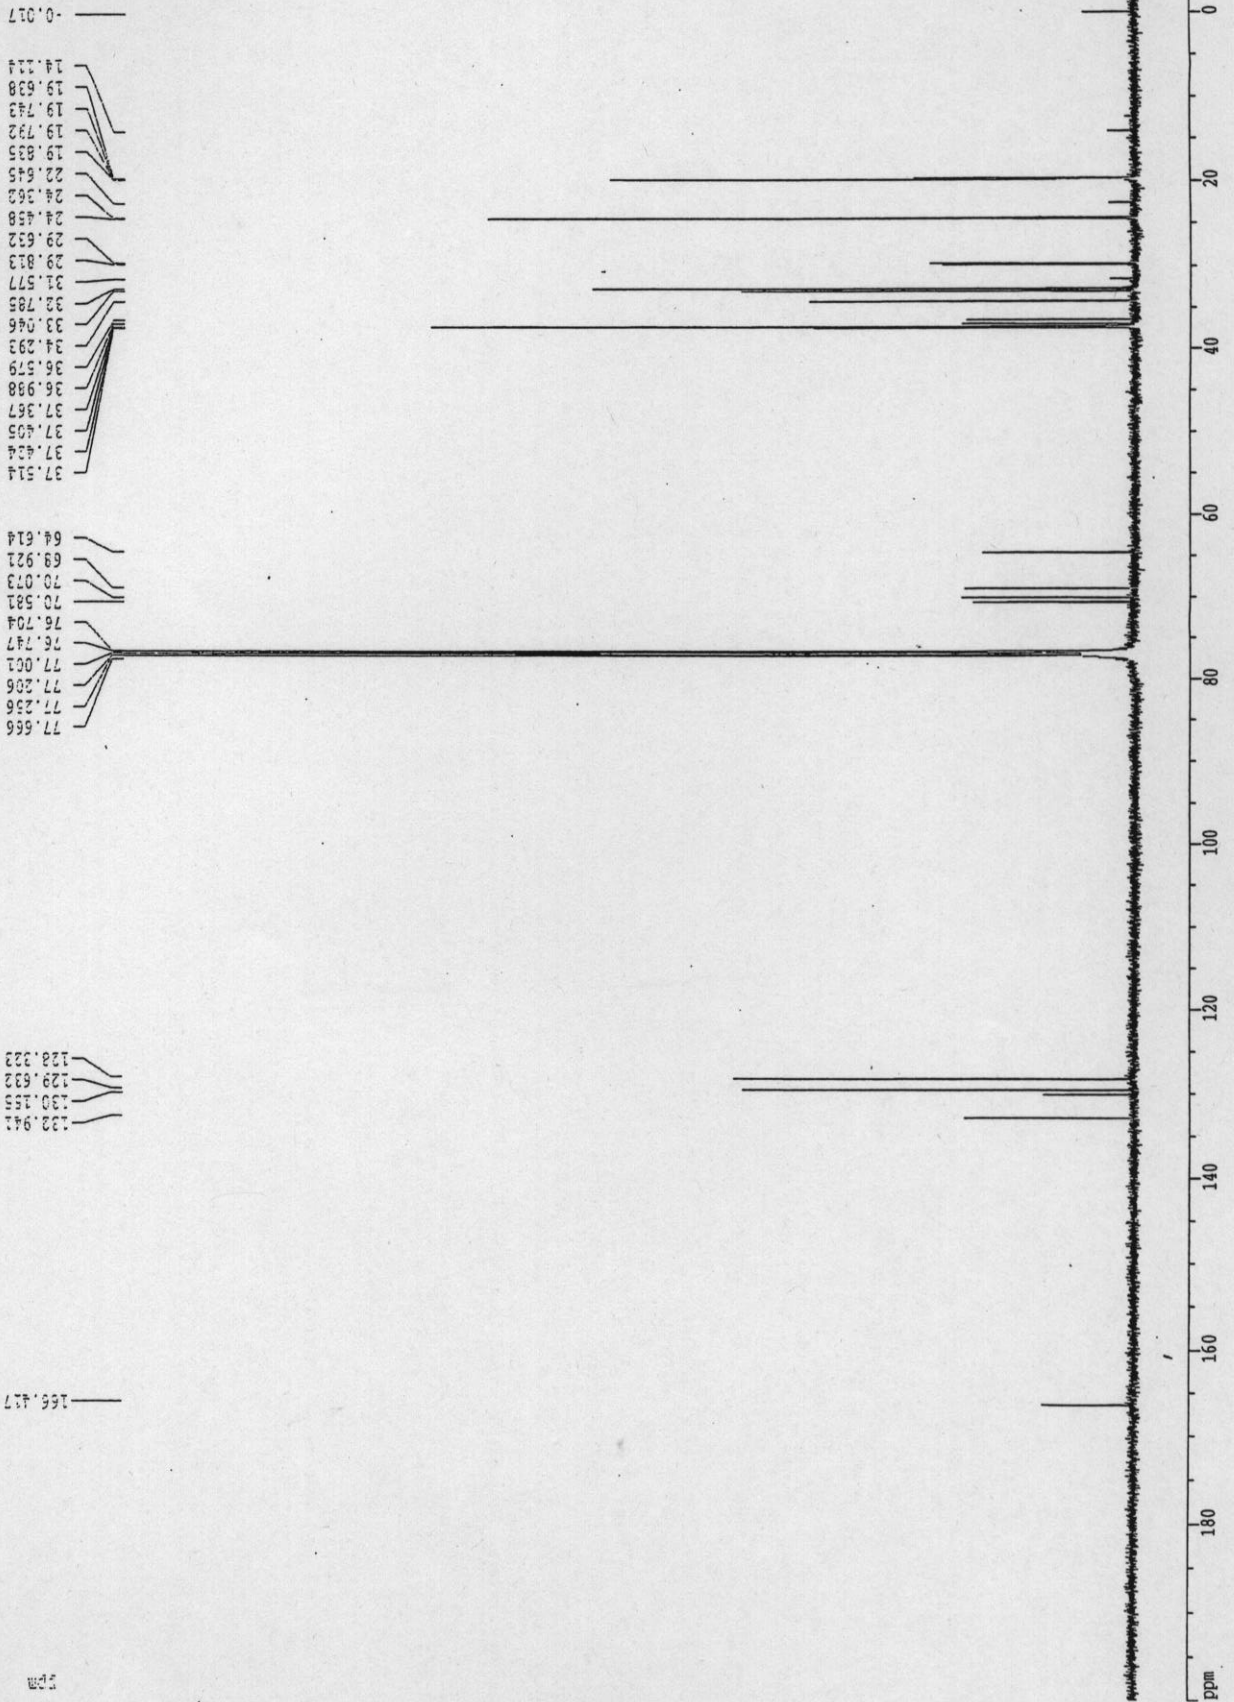

Current Data Parameters  
 NAME ymatsu-takyo  
 EXPNO 25  
 PROCNO 1

F2 - Acquisition Parameters  
 Date\_ 990824  
 Time 6.36  
 INSTRUM spect  
 PROBHD 5 mm Multinu  
 PULPROG zgpg  
 TD 65536  
 SOLVENT CDC13  
 NS 5120  
 DS 8  
 SWH 30303.031 Hz  
 FIDRES 0.462388 Hz  
 AQ 1.0813940 sec  
 RG 4096  
 DW 16.500 usec  
 DE 6.00 usec  
 TE 300.0 K  
 d11 0.03000000 sec  
 d12 0.00002000 sec  
 PL13 18.70 dB  
 DI 2.00000000 sec  
 CPDPRG2 waitz16  
 PCPD2 90.00 usec  
 SFO2 500.1320005 MHz  
 NUC2 1H  
 PL2 120.00 dB  
 PL12 18.70 dB  
 P1 4.30 usec  
 SFO1 125.7715723 MHz  
 NUC1 13C  
 PL1 3.00 dB

F2 - Processing parameters  
 SI 65536  
 SF 125.7577922 MHz  
 WDW EN  
 SSB 0  
 LB 1.00 Hz  
 GB 0  
 PC 1.40

1D NMR plot parameters  
 CX 33.00 cm  
 F1P 200.000 ppm  
 F1 25151.56 Hz  
 F2P -10.000 ppm  
 F2 -1257.58 Hz  
 PPMCM 6.36364 ppm/cm  
 HZCM 800.27686 Hz/cm



$^{13}\text{C}\{^1\text{H} \& ^2\text{H}\}$  NMR

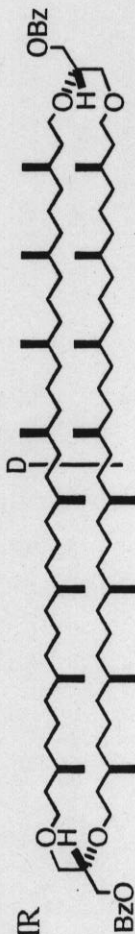

from *Methanococcus jannaschii*

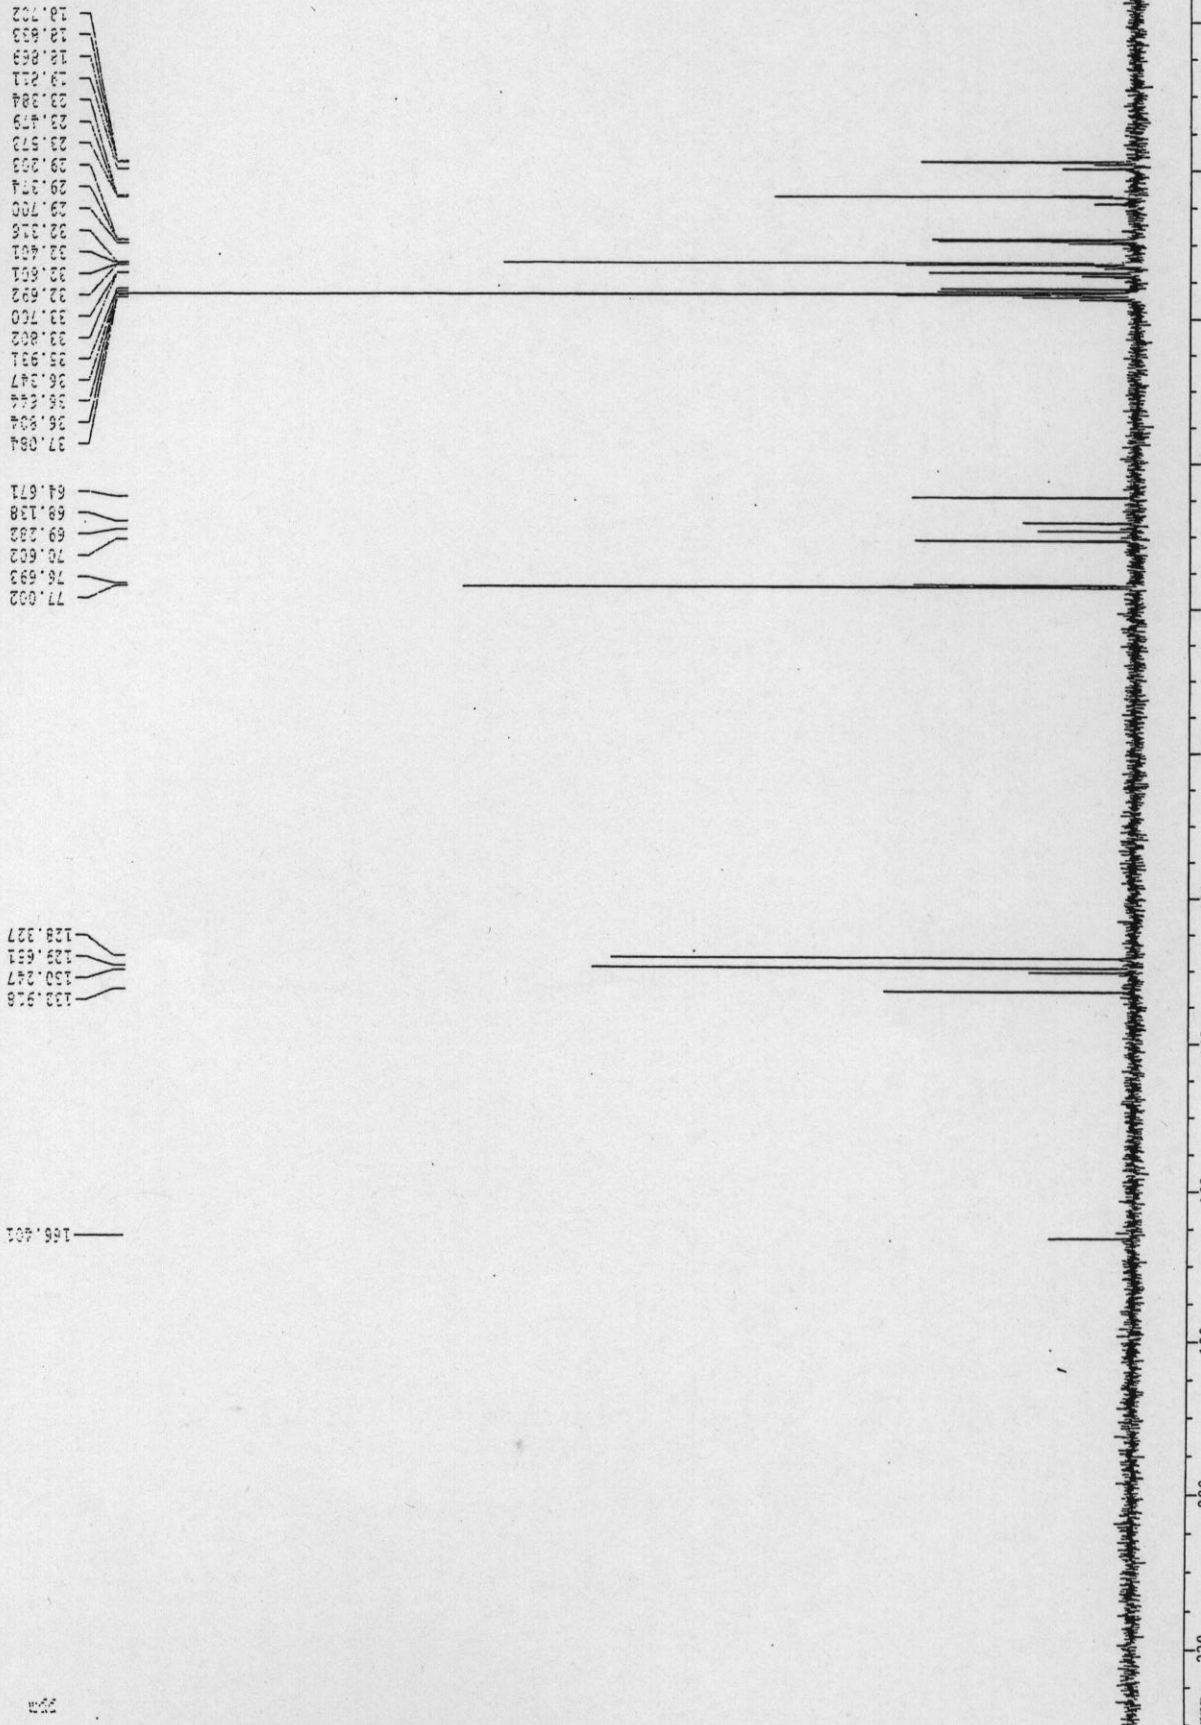

Current Data Parameters  
 NAME ymatsu-takyo  
 EXPRO 6  
 PROCHO 1

F2 - Acquisition Parameters  
 Date\_ 20000205  
 Time 0.55  
 INSTRUM spect  
 PROBHD 5 mm BB (2H)

PULPROG zgpg2h  
 TD 32768  
 SOLVENT CDC13  
 NS 66372  
 DS 0  
 SMH 30303.031 Hz  
 FIDRES 0.324775 Hz  
 AQ 0.5407220 sec  
 RG 4096  
 DM 16.500 usec  
 DE 6.00 usec  
 TE 300.0 K  
 d11 0.03000000 sec  
 d12 0.00002000 sec  
 d13 0.00000300 sec  
 PL16 21.00 dB  
 PL13 18.70 dB  
 D1 2.00000000 sec  
 CPDPRG2 waltz16  
 PCPD2 90.00 usec  
 SF02 500.1320005 MHz  
 NUC2 1H  
 PL2 120.00 dB  
 PL12 18.70 dB  
 P1 4.30 usec  
 SF01 125.7715723 MHz  
 NUC1 13C  
 PL1 3.00 dB  
 CPDPRG3 waltz16  
 PCPD3 300.00 usec  
 SF03 76.7733071 MHz  
 NUC3 2H  
 PL3 120.00 dB

F2 - Processing parameters  
 SI 32768  
 SF 125.7577885 MHz  
 WDW EH  
 SSB 0  
 LB 2.00 Hz  
 GB 0  
 PC 1.40

1D NMR plot parameters  
 CX 33.00 cm  
 F1P 230.000 ppm  
 F1 28924.29 Hz  
 F2P -10.000 ppm  
 F2 -1257.56 Hz  
 PPHCM 7.27273 ppm/cm
