# Supplementary material for: Unusual double-bond migration as a plausible key reaction in the biosynthesis of the isoprenoidal membrane lipids of methanogenic archaea
Source: Royal Society of Chemistry journal article supplement (doi:10.1039/b003948i), 2000-01-01

$^1\text{H}$ - $^1\text{H}$  COSY spectrum (500 MHz,  $\text{CDCl}_3$ ) of multiply deuterated diphytanylglycerol benzoate from *M. jannaschii*

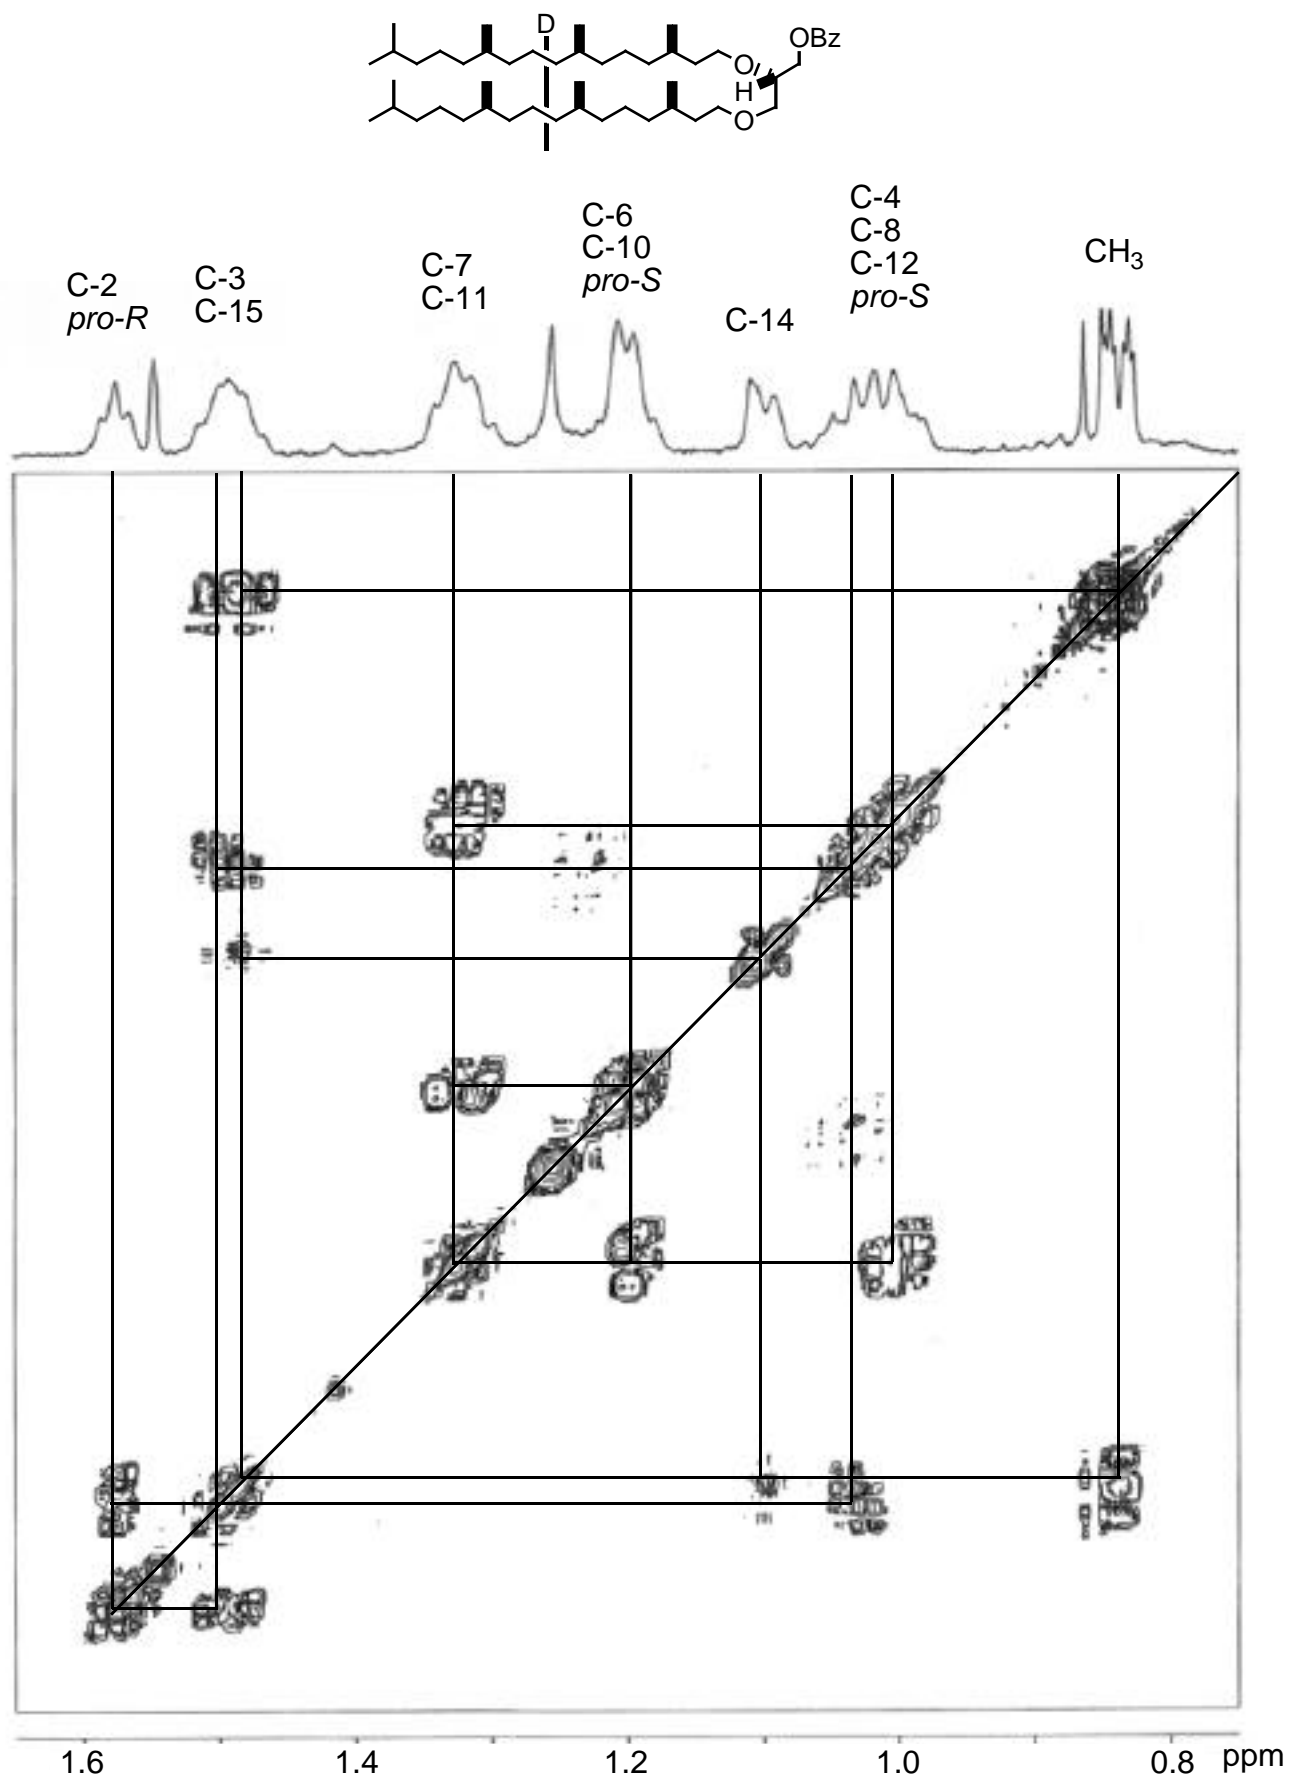

Supplement: b003948i5.pdf [file b003948i5.pdf]
